# Supplementary material
Source: Springer Nature journal article supplement (https://www.springermedizin.de/resource/supplementary/12955_2007_377_MOESM2_ESM.pdf/9560268)

Original cards

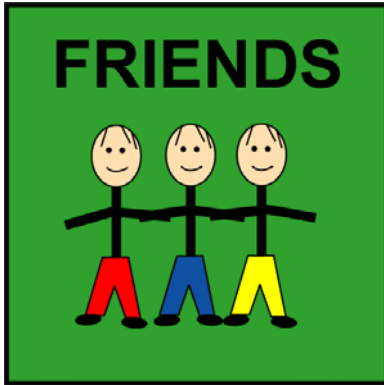

Revised cards

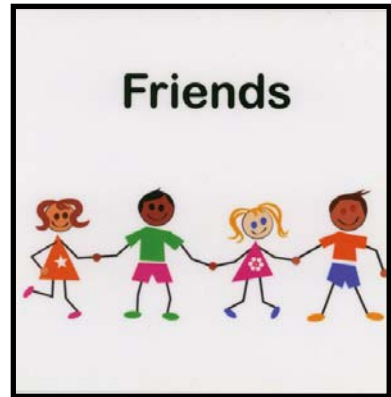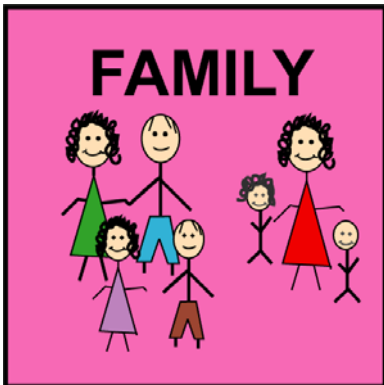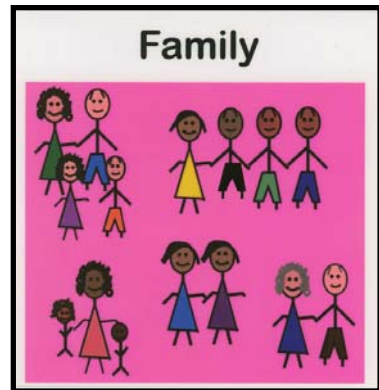

Supplement: MOESM2 [file 9560268]
